# Supplementary material for: Noninvasive ventilation failure in patients with hypoxemic respiratory failure: the role of sepsis and septic shock
Source: PubMed Central journal article supplement — Ther Adv Respir Dis. 2019 Nov 14;13:1753466619888124. doi: 10.1177/1753466619888124 (PMC6856973; doi:10.1177/1753466619888124), 2019-11-14
Supplement: Reviewer_1_v.1.pdf [file Reviewer_1_v.1.pdf]

Reviewer 1, v.1

Comments to the Author

Relevant study with a crucial theme for ICU practice. Multicenter study with adequate study design and adequate analysis of the obtained data. Easy understanding and description of data. I really liked it. I recommend the publication of the study I found it very good. Congratulations to the authors.
