# Supplementary material for: Noninvasive ventilation failure in patients with hypoxemic respiratory failure: the role of sepsis and septic shock
Source: PubMed Central journal article supplement — Ther Adv Respir Dis. 2019 Nov 14;13:1753466619888124. doi: 10.1177/1753466619888124 (PMC6856973; doi:10.1177/1753466619888124), 2019-11-14
Supplement: Reviewer_1_v.2.pdf [file Reviewer_1_v.2.pdf]

Reviewer 1 v.2

Comments to the Author

Relevant study with important information. Although it is clear that patients with sepsis and septic shock evolve with multiple organ dysfunction and this increases the severity of the condition, there was no association with NIV failure. Recommend for publication after improvements made by the authors.
