# Supplementary material for: Noninvasive ventilation failure in patients with hypoxemic respiratory failure: the role of sepsis and septic shock
Source: PubMed Central journal article supplement — Ther Adv Respir Dis. 2019 Nov 14;13:1753466619888124. doi: 10.1177/1753466619888124 (PMC6856973; doi:10.1177/1753466619888124), 2019-11-14
Supplement: Reviewer_2_v.2.pdf [file Reviewer_2_v.2.pdf]

Reviewer 2 v.2

Comments to the Author

I thank the authors for taking into account all my comments. The manuscript looks good now.
